# Supplementary material for: Methane, carbon dioxide and nitrous oxide emissions from two clear-water and two turbid-water urban ponds in Brussels (Belgium)
Source: Copernicus journal article supplement (doi:10.5194/egusphere-2024-1315), 2024-05-14

## Methane, carbon dioxide and nitrous oxide emissions from two clear-water and two turbid-water urban ponds in Brussels (Belgium)

Thomas Bauduin <sup>1,2</sup>, Nathalie Gypens <sup>1</sup>, Alberto V. Borges <sup>2</sup>

<sup>1</sup>Ecology of Aquatic Systems, Université Libre de Bruxelles, Belgium

<sup>2</sup>Chemical Oceanography Unit, University of Liège, Belgium

Correspondence to: Thomas Bauduin (thomas.bauduin@ulb.be)

**Table S1: Emergent, submerged, and total macrophyte cover and major species in summer 2023 in four urban ponds (Leybeek, Pêcherries, Tenreuken, and Silex) of the city of Brussels (Belgium).**

| Pond       | Emergent macrophyte (EM) cover (%) | Submerged macrophyte (SM) cover (%) | Total macrophyte cover (%) | Major species                                                                                                                                                                                     |
|------------|------------------------------------|-------------------------------------|----------------------------|---------------------------------------------------------------------------------------------------------------------------------------------------------------------------------------------------|
| Leybeek    | 6                                  | 0 (*)                               | 6                          | <i>Caltha palustris</i> (EM), <i>Lythrium salicaria</i> (EM), <i>Phragmites australis</i> (EM), <i>Veronica beccabunga</i> (EM)                                                                   |
| Pêcherries | 9                                  | 0                                   | 9                          | <i>Phragmites australis</i> (EM)                                                                                                                                                                  |
| Tenreuken  | 11                                 | 57                                  | 68                         | <i>Certophyllum demersum</i> (SM), <i>Iris pseudocorus</i> (EM), <i>Lythrum salicaria</i> (EM), <i>Mentha aquatica</i> (EM), <i>Phragmites australis</i> (EM), <i>Potamogeton pectinatus</i> (SM) |
| Silex      | 13                                 | 87                                  | 100                        | <i>Lemna trisulca</i> (SM), <i>Phragmites</i> (EM).                                                                                                                                               |

(\*) Due to high turbidity, the bottom sediment of the Leybeek pond was not visible and the submerged macrophytes were assumed absent. This assumption is based on the fact that in the Pêcherries pond where the bottom sediment was visible owing to lower turbidity, the presence of submerged macrophytes was not observed.

**Table S2: Recent operations in four urban ponds (Leybeek, Pêcheries, Tenreuken, and Silex) of the city of Brussels (Belgium) (provided by Bruxelles Environnement).**

| <b>Pond</b>      | <b>Operation</b>        | <b>Period</b>    |
|------------------|-------------------------|------------------|
| <b>Leybeek</b>   | Riverbank redevelopment | Winter 2017-2018 |
| <b>Pêcheries</b> | Dredging                | Winter 2017-2018 |
| <b>Tenreuken</b> | Draining                | Winter 2014-2015 |
| <b>Silex</b>     | Partial draining        | Winter 2015-2016 |

**Table S3: Pearson correlation coefficients on logarithmically transformed data collected in four urban ponds (Leybeek, Pêcherries, Tenreuken, and Silex) of the city of Brussels (Belgium) from June 2021 to December 2023 of partial pressure of CO<sub>2</sub> (pCO<sub>2</sub>, ppm), dissolved CH<sub>4</sub> concentration (CH<sub>4</sub>, nmol L<sup>-1</sup>), and N<sub>2</sub>O saturation level (%N<sub>2</sub>O, %), versus water temperature (water temp., in °C), daily precipitations (mm d<sup>-1</sup>), oxygen saturation level (%O<sub>2</sub>, in %), concentration of soluble reactive phosphorus (SRP, in μmol L<sup>-1</sup>), concentration of dissolved inorganic nitrogen (DIN, in μmol L<sup>-1</sup>), concentration of chlorophyll-*a* (Chl-*a*, in μg L<sup>-1</sup>), and concentration of total suspended matter (TSM, in mg L<sup>-1</sup>) in individual pond and for all ponds “all”. Only statistically significant correlations (p <0.05) are reported; ns=non-significant correlations.**

|                                            | Pond       | Water temp.<br>(°C) | Precipitations<br>(mm d <sup>-1</sup> ) | %O <sub>2</sub><br>(%) | SRP<br>(μmol L <sup>-1</sup> ) | DIN<br>(μmol L <sup>-1</sup> ) | Chl- <i>a</i><br>(μg L <sup>-1</sup> ) | TSM<br>(mg L <sup>-1</sup> ) |
|--------------------------------------------|------------|---------------------|-----------------------------------------|------------------------|--------------------------------|--------------------------------|----------------------------------------|------------------------------|
| pCO <sub>2</sub><br>(ppm)                  | Leybeek    | <b>-0.39</b>        | <b>0.55</b>                             | <b>-0.70</b>           | ns                             | <b>0.47</b>                    | <b>-0.33</b>                           | ns                           |
|                                            | Pêcherries | ns                  | <b>0.52</b>                             | <b>-0.71</b>           | <b>0.33</b>                    | <b>0.45</b>                    | ns                                     | ns                           |
|                                            | Tenreuken  | ns                  | <b>0.38</b>                             | <b>-0.61</b>           | <b>0.40</b>                    | <b>0.48</b>                    | ns                                     | ns                           |
|                                            | Silex      | ns                  | <b>0.30</b>                             | <b>-0.39</b>           | ns                             | ns                             | ns                                     | ns                           |
|                                            | All        | ns                  | <b>0.33</b>                             | <b>-0.63</b>           | ns                             | <b>0.38</b>                    | ns                                     | ns                           |
| CH <sub>4</sub><br>(nmol L <sup>-1</sup> ) | Leybeek    | <b>0.33</b>         | ns                                      | ns                     | ns                             | ns                             | ns                                     | ns                           |
|                                            | Pêcherries | <b>0.52</b>         | <b>-0.35</b>                            | ns                     | ns                             | <b>-0.50</b>                   | ns                                     | ns                           |
|                                            | Tenreuken  | <b>0.36</b>         | ns                                      | ns                     | ns                             | ns                             | ns                                     | <b>-0.31</b>                 |
|                                            | Silex      | <b>0.45</b>         | ns                                      | ns                     | <b>0.48</b>                    | ns                             | <b>-0.29</b>                           | ns                           |
|                                            | All        | <b>0.32</b>         | ns                                      | ns                     | <b>0.14</b>                    | ns                             | ns                                     | ns                           |
| %N <sub>2</sub> O<br>(%)                   | Leybeek    | ns                  | ns                                      | ns                     | ns                             | ns                             | ns                                     | ns                           |
|                                            | Pêcherries | ns                  | ns                                      | ns                     | ns                             | ns                             | ns                                     | ns                           |
|                                            | Tenreuken  | <b>-0.31</b>        | ns                                      | ns                     | ns                             | ns                             | ns                                     | <b>0.33</b>                  |
|                                            | Silex      | ns                  | ns                                      | ns                     | ns                             | ns                             | <b>-0.57</b>                           | ns                           |
|                                            | All        | ns                  | ns                                      | ns                     | ns                             | ns                             | ns                                     | ns                           |

**Table S4: Exponential regression of ebullitive and diffusive CH<sub>4</sub> fluxes (mmol m<sup>-2</sup> d<sup>-1</sup>) as function of water temperature (Temp, in °C) and corresponding Q<sub>10</sub>, coefficient of regression r<sup>2</sup> and p-value in four urban ponds (Leybeek, Pêcherries, Tenreuken, and Silex) of the city of Brussels (Belgium). Ebullitive CH<sub>4</sub> fluxes were measured in spring, summer, and fall in 2022 and 2023, totaling 8 days in Leybeek, Pêcherries and Tenreuken ponds and 24 days in Silex pond, with three bubble traps. Diffusive CH<sub>4</sub> fluxes were derived from CH<sub>4</sub> concentration data collected 46 times on each pond from June 2021 to December 2023.**

| Pond       | Ebullition                                                 |                 |                |         | Diffusion                                                  |                 |                |         |
|------------|------------------------------------------------------------|-----------------|----------------|---------|------------------------------------------------------------|-----------------|----------------|---------|
|            | Function (Temp)<br>(mmol m <sup>-2</sup> d <sup>-1</sup> ) | Q <sub>10</sub> | r <sup>2</sup> | p-value | Function (Temp)<br>(mmol m <sup>-2</sup> d <sup>-1</sup> ) | Q <sub>10</sub> | r <sup>2</sup> | p-value |
| Leybeek    | $0.01 \cdot e^{0.32 \cdot Temp}$                           | 26.9            | 0.89           | <0.0001 | $0.22 \cdot e^{0.07 \cdot Temp}$                           | 2.1             | 0.11           | 0.0012  |
| Pêcherries | $0.16 \cdot e^{0.15 \cdot Temp}$                           | 4.4             | 0.23           | 0.0032  | $0.39 \cdot e^{0.02 \cdot Temp}$                           | 1.2             | 0.13           | 0.0009  |
| Tenreuken  | $0.10 \cdot e^{0.23 \cdot Temp}$                           | 9.7             | 0.72           | <0.0001 | $0.26 \cdot e^{0.06 \cdot Temp}$                           | 1.9             | 0.10           | 0.0032  |
| Silex      | $0.54 \cdot e^{0.18 \cdot Temp}$                           | 6.2             | 0.92           | <0.0001 | $0.22 \cdot e^{0.11 \cdot Temp}$                           | 2.9             | 0.18           | 0.0004  |

  

| Pond       | Ebul/Tot (%)                                     |                |         |
|------------|--------------------------------------------------|----------------|---------|
|            | Function (Temp) (%)                              | r <sup>2</sup> | p-value |
| Leybeek    | $\frac{1}{1 + 22 \times e^{-0.25 \cdot Temp}}$   | 0.71           | <0.0001 |
| Pêcherries | $\frac{1}{1 + 2.43 \times e^{-0.13 \cdot Temp}}$ | 0.17           | 0.0043  |
| Tenreuken  | $\frac{1}{1 + 2.60 \times e^{-0.17 \cdot Temp}}$ | 0.45           | <0.0001 |
| Silex      | $\frac{1}{1 + 0.40 \times e^{-0.07 \cdot Temp}}$ | 0.30           | <0.0001 |

**Table S5: Outcomes of regressions between variables, number of values (n), equation of the regression, regression coefficient (r<sup>2</sup>), and p-value. Transformations have been applied to the data to ensure a normal distribution and are indicated in the equation column.**

| Figure | Variable 1 (X)                                                         | Variable 2 (Y)                                                                                       | n   | Equation                                            | r <sup>2</sup> | p-value |
|--------|------------------------------------------------------------------------|------------------------------------------------------------------------------------------------------|-----|-----------------------------------------------------|----------------|---------|
| 2      | Precipitation anomaly (%)                                              | Temperature anomaly (°C)                                                                             | 20  | $Y = 3.29 - 0.03 \cdot X$                           | 0.32           | 0.0147  |
| 4      | Temperature (°C)                                                       | Bubbles flux (mL m <sup>-1</sup> d <sup>-1</sup> )                                                   | 139 | $Y = 28 \cdot e^{0.14 \cdot X}$                     | 0.65           | <0.0001 |
|        | %CH <sub>4</sub> (%)                                                   | Bubbles flux (mL m <sup>-1</sup> d <sup>-1</sup> )                                                   | 123 | $Y = 164 \cdot e^{0.03 \cdot X}$                    | 0.36           | 0.0053  |
| 6      | Water depth (cm)                                                       | CH <sub>4</sub> ebullition Q <sub>10</sub>                                                           | 6   | $Y = 92 \cdot e^{-0.02 \cdot X}$                    | 0.75           | 0.0263  |
| 8      | Chlorophyll- <i>a</i> (Chl- <i>a</i> , in µg L <sup>-1</sup> )         | Diffusive CH <sub>4</sub> flux (mmol m <sup>-1</sup> d <sup>-1</sup> )                               | 4   | $Y = 3.5 - 4.1 \cdot \log(X) + 1.7 \cdot \log(X)^2$ | 0.96           | 0.0132  |
|        |                                                                        | Ebullitive CH <sub>4</sub> flux (mmol m <sup>-1</sup> d <sup>-1</sup> )                              | 4   | $Y = 1.4 \cdot e^{-0.89 \cdot \log(X)}$             | 0.70           | 0.0432  |
|        |                                                                        | Ebul/Tot (%)                                                                                         | 4   | $Y = 94 - 21 \cdot \log(X)$                         | 0.99           | 0.0021  |
|        | Total macrophyte cover in summer (%)                                   | Diffusive CH <sub>4</sub> flux (mmol m <sup>-1</sup> d <sup>-1</sup> )                               | 4   | $Y = 1.4 - 0.01 \cdot X + 0.0001 \cdot X^2$         | 0.69           | 0.0493  |
|        |                                                                        | Ebullitive CH <sub>4</sub> flux (mmol m <sup>-1</sup> d <sup>-1</sup> )                              | 4   | $Y = 3.08 \cdot e^{0.013 \cdot X}$                  | 0.72           | 0.0328  |
|        |                                                                        | Ebul/Tot (%)                                                                                         | 4   | $Y = 61.57 + 0.22 \cdot X$                          | 0.81           | 0.0099  |
| 10     | Chlorophyll- <i>a</i> (Chl- <i>a</i> , in µg L <sup>-1</sup> )         | δ <sup>13</sup> C-CH <sub>4</sub> of perturbed sediments (‰)                                         | 4   | $Y = -83.34 + 8.33 \cdot \log(X)$                   | 0.67           | 0.1802  |
|        | Total macrophyte cover in summer (%)                                   | δ <sup>13</sup> C-CH <sub>4</sub> of perturbed sediments (‰)                                         | 4   | $Y = -69.94 - 0.11 \cdot X$                         | 0.82           | 0.0878  |
| 12     | Total suspended matter (TSM, in mg L <sup>-1</sup> )                   | δ <sup>13</sup> C-CH <sub>4</sub> of water (‰)                                                       | 145 | $Y = -57.58 + 11.33 \cdot X$                        | 0.19           | <0.0001 |
|        |                                                                        | FOX (%)                                                                                              | 145 | $Y = 45.08 + 23.94 \cdot X$                         | 0.32           | <0.0001 |
|        |                                                                        | MOX (mmol m <sup>-2</sup> d <sup>-1</sup> )                                                          | 145 | $\log(Y) = 3.32 + 0.38 \cdot \log(X)$               | 0.23           | <0.0001 |
|        | Chlorophyll- <i>a</i> (Chl- <i>a</i> , in µg L <sup>-1</sup> )         | δ <sup>13</sup> C-CH <sub>4</sub> of water (‰)                                                       | 145 | $Y = -51.39 + 6.47 \cdot X$                         | 0.16           | <0.0001 |
|        |                                                                        | FOX (%)                                                                                              | 145 | $Y = 60.13 + 10.86 \cdot X$                         | 0.17           | <0.0001 |
|        |                                                                        | MOX (mmol m <sup>-2</sup> d <sup>-1</sup> )                                                          | 145 | $\log(Y) = 3.57 + 0.17 \cdot \log(X)$               | 0.17           | <0.0001 |
| S5     | Diffusive CH <sub>4</sub> flux (mmol m <sup>-1</sup> d <sup>-1</sup> ) | Ebullitive CH <sub>4</sub> flux (mmol m <sup>-1</sup> d <sup>-1</sup> ) (Deemer & Holgerson, 2021)   | 41  | $\log(Y) = 0.23 + 0.68 \cdot \log(X)$               | 0.39           | <0.0001 |
|        |                                                                        | Ebullitive CH <sub>4</sub> flux (mmol m <sup>-1</sup> d <sup>-1</sup> ) (Brussels ponds, this study) | 4   | $\log(Y) = 0.26 + 3.15 \cdot \log(X)$               | 0.76           | 0.0402  |
|        | Chlorophyll- <i>a</i> (Chl- <i>a</i> , in µg L <sup>-1</sup> )         | Ebullitive CH <sub>4</sub> flux (mmol m <sup>-1</sup> d <sup>-1</sup> ) (Deemer & Holgerson, 2021)   | 28  | $\log(Y) = -0.45 + 0.62 \cdot \log(X)$              | 0.29           | <0.0001 |

**Table S6 : Outcomes of ordinary One-Way ANOVA comparisons (Figs. 3, 7, and 11), with log-transformed data, for chlorophyll-*a* (Chl-*a*, in  $\mu\text{g L}^{-1}$ ), total suspended matter, (TSM, in  $\text{mg L}^{-1}$ ), oxygen saturation level (%O<sub>2</sub>, in %), partial pressure of CO<sub>2</sub> (pCO<sub>2</sub>, ppm), dissolved CH<sub>4</sub> concentration (CH<sub>4</sub>,  $\text{mmol L}^{-1}$ ), N<sub>2</sub>O saturation level (%N<sub>2</sub>O, %), diffusive and ebullitive CH<sub>4</sub> fluxes ( $\text{mmol m}^{-2} \text{d}^{-1}$ ), mean ratio of ebullitive CH<sub>4</sub> flux to total (diffusive + ebullitive) CH<sub>4</sub> flux (%), <sup>12</sup>C/<sup>13</sup>C ratio of CH<sub>4</sub> in surface waters ( $\delta^{13}\text{C-CH}_4$  in ‰), fraction of CH<sub>4</sub> removed by methane oxidation (FOX, in %), and methane oxidation (MOX, in  $\text{mmol m}^{-2} \text{d}^{-1}$ ) in four urban ponds (Leybeek, Pêcherries, Tenreuken, and Silex) of the city of Brussels (Belgium), and for each season. *p*-values less than 0.05 are in bold.**

| Boxplot 1  |                                  | Boxplot 2                        |               | Chl- <i>a</i><br>( $\mu\text{g L}^{-1}$ ) | TSM<br>( $\text{mg L}^{-1}$ ) | %O <sub>2</sub><br>(%) | pCO <sub>2</sub><br>(ppm) | CH <sub>4</sub><br>( $\text{mmol L}^{-1}$ ) | %N <sub>2</sub> O<br>(%) | Diffusive<br>CH <sub>4</sub><br>( $\text{mmol m}^{-2} \text{d}^{-1}$ ) | Ebullitive<br>CH <sub>4</sub><br>( $\text{mmol m}^{-2} \text{d}^{-1}$ ) | Ebullitive<br>CH <sub>4</sub> ratio<br>(%) | $\delta^{13}\text{C-CH}_4$<br>water<br>(‰) | FOX<br>(%)    | MOX<br>( $\text{mmol m}^{-2} \text{d}^{-1}$ ) |         |
|------------|----------------------------------|----------------------------------|---------------|-------------------------------------------|-------------------------------|------------------------|---------------------------|---------------------------------------------|--------------------------|------------------------------------------------------------------------|-------------------------------------------------------------------------|--------------------------------------------|--------------------------------------------|---------------|-----------------------------------------------|---------|
| Pond 1     | Season 1                         | Pond 2                           | Season 2      | <i>p</i> -value                           |                               |                        |                           |                                             |                          |                                                                        |                                                                         |                                            |                                            |               |                                               |         |
| Leybeek    | Spring                           | Pêcherries<br>Tenreuken<br>Silex | Spring        | <0.0001                                   | 0.8736                        | 0.9942                 | 0.9813                    | >0.9999                                     | 0.9757                   | >0.9999                                                                | >0.9999                                                                 | >0.9999                                    | 0.9971                                     | >0.9999       | >0.9999                                       | >0.9999 |
|            |                                  |                                  | Summer        | <0.0001                                   | 0.0554                        | >0.9999                | 0.9994                    | 0.9655                                      | >0.9999                  | 0.9804                                                                 | <b>0.0175</b>                                                           | 0.9762                                     | 0.253                                      | <b>0.0064</b> | 0.8877                                        |         |
|            |                                  |                                  | Fall          | <0.0001                                   | <b>0.0018</b>                 | 0.9955                 | 0.1605                    | 0.5663                                      | >0.9999                  | 0.5009                                                                 | <0.0001                                                                 | 0.5115                                     | 0.1717                                     | <b>0.0032</b> | 0.9713                                        |         |
|            |                                  | Leybeek                          | Spring        | >0.9999                                   | 0.977                         | >0.9999                | 0.4536                    | >0.9999                                     | 0.9996                   | >0.9999                                                                | <0.0001                                                                 | <b>0.0071</b>                              | >0.9999                                    | 0.1533        | 0.8017                                        |         |
|            |                                  |                                  | Summer        | >0.9999                                   | 0.9995                        | 0.5519                 | 0.9315                    | 0.4129                                      | >0.9999                  | 0.9129                                                                 | <0.0001                                                                 | <0.0001                                    | 0.2833                                     | 0.9361        | 0.3962                                        |         |
|            |                                  |                                  | Fall          | >0.9999                                   | <b>0.0001</b>                 | 0.3118                 | <b>0.0092</b>             | >0.9999                                     | 0.9921                   | >0.9999                                                                | 0.8799                                                                  | 0.9641                                     | >0.9999                                    | >0.9999       | 0.9972                                        |         |
|            | Summer                           | Pêcherries<br>Tenreuken<br>Silex | Summer        | <0.0001                                   | <0.0001                       | 0.9976                 | 0.7891                    | 0.9998                                      | 0.0585                   | 0.6007                                                                 | 0.2726                                                                  | 0.9962                                     | <b>0.0172</b>                              | <0.0001       | <0.0001                                       | <0.0001 |
|            |                                  |                                  | Fall          | <0.0001                                   | <0.0001                       | >0.9999                | 0.6597                    | 0.958                                       | >0.9999                  | <0.0001                                                                | 0.9996                                                                  | <b>0.0043</b>                              | <b>0.0093</b>                              | 0.9438        |                                               |         |
|            |                                  |                                  | Winter        | 0.9961                                    | 0.9996                        | 0.9645                 | 0.1619                    | >0.9999                                     | >0.9999                  | >0.9999                                                                | <0.0001                                                                 | <0.0001                                    | >0.9999                                    | 0.9999        | 0.9841                                        |         |
|            |                                  | Leybeek                          | Summer        | 0.3777                                    | 0.99                          | 0.7365                 | 0.7566                    | 0.0605                                      | >0.9999                  | >0.9999                                                                | >0.9999                                                                 | <0.0001                                    | <0.0001                                    | >0.9999       | >0.9999                                       | 0.1054  |
|            |                                  |                                  | Fall          | <b>0.0008</b>                             | <b>0.0148</b>                 | <b>0.0083</b>          | 0.9986                    | 0.9904                                      | 0.3692                   | 0.1755                                                                 | <b>0.0066</b>                                                           | <b>0.0023</b>                              | >0.9999                                    | >0.9999       | 0.998                                         |         |
|            |                                  |                                  | Winter        | <0.0001                                   | 0.2055                        | >0.9999                | 0.9364                    | >0.9999                                     | 0.2267                   | <0.0001                                                                | <0.0001                                                                 | 0.0553                                     | >0.9999                                    | >0.9999       | 0.556                                         |         |
| Fall       | Pêcherries<br>Tenreuken<br>Silex | Fall                             | <0.0001       | <0.0001                                   | >0.9999                       | >0.9999                | >0.9999                   | >0.9999                                     | 0.6431                   | <0.0001                                                                | <0.0001                                                                 | >0.9999                                    | 0.9748                                     | 0.4157        |                                               |         |
|            |                                  | Summer                           | 0.9954        | >0.9999                                   | >0.9999                       | >0.9999                | 0.1392                    | >0.9999                                     | >0.9999                  | <0.0001                                                                | 0.0001                                                                  | >0.9999                                    | >0.9999                                    | <b>0.0077</b> |                                               |         |
|            |                                  | Winter                           | 0.3472        | 0.2438                                    | >0.9999                       | >0.9999                | >0.9999                   | 0.982                                       | >0.9999                  | <0.0001                                                                | <0.0001                                                                 | >0.9999                                    | >0.9999                                    | >0.9999       |                                               |         |
|            | Leybeek                          | Fall                             | 0.757         | >0.9999                                   | >0.9999                       | >0.9999                | >0.9999                   | 0.8752                                      | >0.9999                  | <0.0001                                                                | <0.0001                                                                 | 0.5268                                     | >0.9999                                    | >0.9999       |                                               |         |
|            |                                  | Summer                           | <b>0.0086</b> | 0.3998                                    | >0.9999                       | >0.9999                | 0.9936                    | >0.9999                                     | 0.7667                   | <0.0001                                                                | <0.0001                                                                 | 0.9449                                     | 0.9979                                     | >0.9999       |                                               |         |
|            |                                  | Winter                           | >0.9999       | 0.986                                     | >0.9999                       | >0.9999                | 0.4029                    | 0.1702                                      | >0.9999                  | 0.2335                                                                 | <b>0.004</b>                                                            | 0.8333                                     |                                            |               |                                               |         |
| Pêcherries | Spring                           | Tenreuken<br>Silex               | Spring        | >0.9999                                   | 0.986                         | >0.9999                | >0.9999                   | 0.9765                                      | 0.4029                   | 0.1702                                                                 | >0.9999                                                                 | 0.2335                                     | <b>0.004</b>                               | 0.8333        |                                               |         |
|            |                                  |                                  | Summer        | >0.9999                                   | 0.5498                        | >0.9999                | 0.9747                    | 0.8233                                      | >0.9999                  | 0.9928                                                                 | <0.0001                                                                 | 0.998                                      | 0.1607                                     | <b>0.002</b>  | 0.9461                                        |         |
|            |                                  |                                  | Fall          | <b>0.0225</b>                             | >0.9999                       | 0.9938                 | 0.9847                    | >0.9999                                     | <b>0.0039</b>            | 0.1897                                                                 | >0.9999                                                                 | 0.2786                                     | 0.4317                                     | 0.5957        |                                               |         |
|            |                                  | Pêcherries                       | Spring        | 0.9989                                    | >0.9999                       | <b>0.0008</b>          | 0.6986                    | 0.9974                                      | >0.9999                  | 0.6761                                                                 | 0.94                                                                    | >0.9999                                    | >0.9999                                    | 0.5467        | 0.9662                                        |         |
|            |                                  |                                  | Summer        | 0.9874                                    | >0.9999                       | >0.9999                | >0.9999                   | 0.3253                                      | >0.9999                  | 0.1676                                                                 | <b>0.0029</b>                                                           | >0.9999                                    | 0.9938                                     | 0.8622        | 0.9997                                        |         |
|            |                                  |                                  | Fall          | <0.0001                                   | <b>0.0218</b>                 | 0.9761                 | 0.8433                    | >0.9999                                     | >0.9999                  | <b>0.0096</b>                                                          | 0.9884                                                                  | <0.0001                                    | <0.0001                                    | <0.0001       | <0.0001                                       |         |
|            | Summer                           | Tenreuken<br>Silex               | Summer        | <0.0001                                   | <b>0.0002</b>                 | 0.5902                 | >0.9999                   | 0.3437                                      | 0.318                    | <b>0.0001</b>                                                          | <0.0001                                                                 | 0.9984                                     | <0.0001                                    | <b>0.001</b>  | 0.5863                                        |         |
|            |                                  |                                  | Fall          | 0.5453                                    | 0.9959                        | <b>0.0091</b>          | 0.9996                    | 0.9985                                      | >0.9999                  | <b>0.0026</b>                                                          | <b>0.0003</b>                                                           | 0.7374                                     | 0.8439                                     | >0.9999       | >0.9999                                       |         |
|            |                                  |                                  | Winter        | 0.8477                                    | >0.9999                       | >0.9999                | 0.9905                    | 0.2529                                      | 0.9903                   | 0.9964                                                                 | <0.0001                                                                 | 0.9879                                     | 0.9993                                     | >0.9999       | 0.0729                                        |         |
|            |                                  | Leybeek                          | Summer        | 0.2802                                    | >0.9999                       | 0.078                  | 0.9994                    | >0.9999                                     | 0.8882                   | >0.9999                                                                | 0.9902                                                                  | >0.9999                                    | 0.0578                                     | >0.9999       | 0.9981                                        |         |
|            |                                  |                                  | Fall          | 0.6452                                    | 0.9789                        | <b>0.0066</b>          | >0.9999                   | >0.9999                                     | 0.8449                   | 0.3498                                                                 | <b>0.0027</b>                                                           | 0.8658                                     | >0.9999                                    | 0.9923        | 0.9907                                        |         |
|            |                                  |                                  | Winter        | >0.9999                                   | >0.9999                       | <b>0.0323</b>          | 0.7601                    | 0.9659                                      | >0.9999                  | <b>0.0203</b>                                                          | 0.3416                                                                  | >0.9999                                    | >0.9999                                    | >0.9999       | 0.4577                                        |         |
| Winter     | Tenreuken<br>Silex               | Winter                           | >0.9999       | 0.7514                                    | >0.9999                       | >0.9999                | >0.9999                   | 0.9997                                      | 0.5932                   | >0.9999                                                                | >0.9999                                                                 | 0.3992                                     | >0.9999                                    | >0.9999       |                                               |         |
|            |                                  | Summer                           | 0.9875        | >0.9999                                   | >0.9999                       | >0.9999                | 0.9983                    | >0.9999                                     | 0.9997                   | 0.1784                                                                 | 0.9988                                                                  | 0.87                                       | 0.9993                                     | >0.9999       |                                               |         |
|            |                                  | Fall                             | >0.9999       | 0.9998                                    | >0.9999                       | 0.8373                 | >0.9999                   | >0.9999                                     | 0.9968                   | 0.4698                                                                 | >0.9999                                                                 | >0.9999                                    | >0.9999                                    | >0.9999       |                                               |         |
|            | Leybeek                          | Winter                           | 0.9889        | >0.9999                                   | >0.9999                       | >0.9999                | 0.721                     | 0.9628                                      | 0.4961                   | <b>0.0468</b>                                                          | 0.748                                                                   | 0.9963                                     | 0.8375                                     | 0.9976        |                                               |         |
|            |                                  | Summer                           | 0.9668        | 0.8032                                    | 0.8385                        | 0.9759                 | 0.2867                    | >0.9999                                     | 0.1765                   | 0.1006                                                                 | >0.9999                                                                 | >0.9999                                    | <0.0001                                    | 0.6359        |                                               |         |
|            |                                  | Fall                             | 0.8355        | 0.0512                                    | 0.9748                        | >0.9999                | <b>0.0277</b>             | >0.9999                                     | >0.9999                  | <0.0001                                                                | 0.9999                                                                  | 0.9954                                     | <0.0001                                    | >0.9999       |                                               |         |
| Tenreuken  | Summer                           | Silex                            | Summer        | <b>0.0001</b>                             | 0.9962                        | >0.9999                | 0.9873                    | 0.0851                                      | 0.9024                   | 0.1108                                                                 | 0.4934                                                                  | >0.9999                                    | >0.9999                                    | 0.9712        | <b>0.0047</b>                                 |         |
|            |                                  |                                  | Fall          | >0.9999                                   | 0.2528                        | 0.9895                 | 0.9871                    | 0.9994                                      | 0.8661                   | 0.2039                                                                 | <0.0001                                                                 | 0.5053                                     | 0.9896                                     | <b>0.0001</b> | <b>0.0458</b>                                 |         |
|            |                                  |                                  | Winter        | 0.0595                                    | <b>0.0014</b>                 | 0.9999                 | >0.9999                   | 0.7076                                      | 0.8236                   | <b>0.0049</b>                                                          | <0.0001                                                                 | 0.2368                                     | >0.9999                                    | <b>0.0099</b> | 0.9892                                        |         |
|            | Fall                             | Silex                            | Fall          | >0.9999                                   | 0.5268                        | >0.9999                | >0.9999                   | 0.9997                                      | >0.9999                  | <0.0001                                                                | 0.2205                                                                  | 0.9982                                     | 0.2985                                     | 0.9985        | >0.9999                                       |         |
|            |                                  |                                  | Summer        | 0.0692                                    | 0.9619                        | >0.9999                | 0.9584                    | 0.9996                                      | >0.9999                  | >0.9999                                                                | <b>0.0026</b>                                                           | >0.9999                                    | 0.9878                                     | >0.9999       | 0.901                                         |         |
|            |                                  |                                  | Winter        | 0.8729                                    | 0.8806                        | >0.9999                | >0.9999                   | >0.9999                                     | >0.9999                  | 0.9999                                                                 | 0.0753                                                                  | 0.981                                      | >0.9999                                    | >0.9999       | >0.9999                                       |         |
| Silex      | Spring                           | Silex                            | Spring        | <b>0.0006</b>                             | >0.9999                       | >0.9999                | >0.9999                   | >0.9999                                     | >0.9999                  | >0.9999                                                                | 0.3177                                                                  | >0.9999                                    | 0.9993                                     | <b>0.0357</b> | 0.6524                                        |         |
|            |                                  |                                  | Summer        | >0.9999                                   | >0.9999                       | >0.9999                | 0.4416                    | 0.9994                                      | 0.7132                   | 0.3391                                                                 | >0.9999                                                                 | 0.2238                                     | <0.0001                                    | >0.9999       | 0.9139                                        |         |
|            |                                  |                                  | Fall          | >0.9999                                   | 0.4955                        | 0.996                  | 0.9995                    | 0.0598                                      | >0.9999                  | 0.901                                                                  | <0.0001                                                                 | >0.9999                                    | 0.6554                                     | <b>0.0001</b> | >0.9999                                       |         |
|            | Summer                           | Silex                            | Summer        | <b>0.0032</b>                             | 0.9994                        | 0.9981                 | >0.9999                   | 0.4427                                      | >0.9999                  | 0.2083                                                                 | <0.0001                                                                 | >0.9999                                    | 0.7471                                     | 0.5318        | >0.9999                                       |         |
|            |                                  |                                  | Fall          | <b>0.0001</b>                             | 0.1109                        | 0.8458                 | >0.9999                   | <b>0.0449</b>                               | >0.9999                  | >0.9999                                                                | <0.0001                                                                 | >0.9999                                    | 0.9881                                     | 0.6988        | 0.8333                                        |         |
|            |                                  |                                  | Winter        | 0.9998                                    | 0.857                         | >0.9999                | 0.9992                    | 0.9997                                      | >0.9999                  | >0.9999                                                                | 0.0718                                                                  | >0.9999                                    | >0.9999                                    | >0.9999       | 0.9663                                        |         |

**Table S7 : Outcomes of ordinary One-Way ANOVA comparisons (Fig. 13), with log-transformed data (negative signs of  $\delta^{13}\text{C}-\text{CH}_4$  were removed before transformation) of  $^{12}\text{C}/^{13}\text{C}$  ratio of  $\text{CH}_4$  ( $\delta^{13}\text{C}-\text{CH}_4$  in ‰) in bubbles collected during ebullitive fluxes measurements (“trapped bubbles”) in four urban ponds (Leybeek, Pêcherries, Tenreuken, and Silex) in the city of Brussels (Belgium), measured in spring, summer and fall in 2022 and 2023 (September 2023 and October 2023 in Leybeek; July 2023 and October 2023 in Pêcherries; August 2023 and October 2023 in Tenreuken; April 2022 and July 2022 in Silex), for each season. *p*-values less than 0.05 are in bold.**

| Boxplot 1  |          | Boxplot 2       |          | p-value         |
|------------|----------|-----------------|----------|-----------------|
| Pond 1     | Season 1 | Pond 2          | Season 2 |                 |
| Leybeek    | Summer   | Leybeek         | Fall     | < <b>0.0001</b> |
|            |          | Pêcherries      | Summer   | 0.9975          |
|            |          |                 | Fall     | < <b>0.0001</b> |
|            |          | Tenreuken       | Summer   | >0.9999         |
|            |          |                 | Fall     | < <b>0.0001</b> |
|            | Fall     | Silex           | Spring   | 0.1252          |
|            |          |                 | Summer   | 0.3284          |
|            |          | Pêcherries      | Summer   | < <b>0.0001</b> |
|            |          |                 | Fall     | 0.0943          |
|            |          | Tenreuken       | Summer   | < <b>0.0001</b> |
|            | Fall     | 0.2639          |          |                 |
| Pêcherries | Summer   | Silex           | Spring   | < <b>0.0001</b> |
|            |          |                 | Summer   | < <b>0.0001</b> |
|            |          | Pêcherries      | Fall     | < <b>0.0001</b> |
|            |          | Tenreuken       | Summer   | 0.982           |
|            |          |                 | Fall     | < <b>0.0001</b> |
|            | Fall     | Silex           | Spring   | 0.0764          |
|            |          |                 | Summer   | 0.0853          |
|            |          | Tenreuken       | Summer   | < <b>0.0001</b> |
|            |          |                 | Fall     | 0.9992          |
|            |          | Silex           | Spring   | < <b>0.0001</b> |
|            | Summer   | < <b>0.0001</b> |          |                 |
| Tenreuken  | Summer   | Tenreuken       | Fall     | < <b>0.0001</b> |
|            |          | Silex           | Spring   | 0.0887          |
|            |          | Summer          | 0.112    |                 |
|            | Fall     | Silex           | Spring   | < <b>0.0001</b> |
|            | Summer   | < <b>0.0001</b> |          |                 |
| Silex      | Spring   | Silex           | Summer   | 0.1012          |

Table S8: Outcomes of ordinary One-Way ANOVA comparisons (Fig. 13), with log-transformed data for bubble dissolution flux (Dissolution), methane oxidation (MOX), diffusive CH<sub>4</sub> emissions to atmosphere (Atmospheric), and sedimentary diffusive CH<sub>4</sub> flux (Sedimentary) computed from the other fluxes assuming steady-state (=MOX - Bubble dissolution + atmospheric emissions) in four urban ponds (Leybeek, Pêcherries, Tenreuken, and Silex) in the city of Brussels (Belgium) between June 2021 and December 2023. All fluxes are in mmol m<sup>-2</sup> d<sup>-1</sup>. *p*-values less than 0.05 are in bold.

| Boxplot 1  |             | Boxplot 2   |             | p-value       |               |
|------------|-------------|-------------|-------------|---------------|---------------|
| Pond 1     | Flux 1      | Pond 2      | Flux 2      |               |               |
| Leybeek    | Dissolution | Leybeek     | Atmospheric | <0.0001       |               |
|            | MOX         |             | MOX         | <0.0001       |               |
|            | Sedimentary | Leybeek     | Atmospheric | 0.9628        |               |
|            |             |             | MOX         | <b>0.0459</b> |               |
|            | Pêcherries  | Dissolution | Pêcherries  | Dissolution   | >0.9999       |
|            |             |             |             | MOX           | <b>0.0037</b> |
|            |             | Sedimentary | Pêcherries  | MOX           | <b>0.0027</b> |
|            |             |             |             | Sedimentary   | 0.3372        |
|            | Tenreuken   | Dissolution | Tenreuken   | Atmospheric   | >0.9999       |
|            |             |             |             | MOX           | <0.0001       |
|            |             | Sedimentary | Tenreuken   | MOX           | >0.9999       |
|            |             |             |             | Sedimentary   | 0.9951        |
| Silex      | Dissolution | Silex       | Atmospheric | 0.8734        |               |
|            |             |             | MOX         | <0.0001       |               |
|            | Sedimentary | Silex       | MOX         | <0.0001       |               |
|            |             |             | Sedimentary | <b>0.0002</b> |               |
| Pêcherries | Dissolution | Pêcherries  | Atmospheric | <0.0001       |               |
|            | MOX         |             | MOX         | <0.0001       |               |
|            | Sedimentary | Pêcherries  | Atmospheric | <0.0001       |               |
|            |             |             | MOX         | <0.0001       |               |
|            | Tenreuken   | Dissolution | Tenreuken   | Dissolution   | >0.9999       |
|            |             |             |             | MOX           | 0.9057        |
|            |             | Sedimentary | Tenreuken   | MOX           | <b>0.0008</b> |
|            |             |             |             | Sedimentary   | <b>0.0066</b> |
|            | Silex       | Dissolution | Silex       | Atmospheric   | 0.5764        |
|            |             |             |             | MOX           | <b>0.0043</b> |
|            |             | Sedimentary | Silex       | MOX           | 0.9753        |
|            |             |             |             | Sedimentary   | 0.7736        |
| Tenreuken  | Dissolution | Tenreuken   | Atmospheric | <b>0.0002</b> |               |
|            | MOX         |             | MOX         | <0.0001       |               |
|            | Sedimentary | Tenreuken   | Atmospheric | 0.9624        |               |
|            |             |             | MOX         | 0.5642        |               |
|            | Silex       | Dissolution | Silex       | Dissolution   | <0.0001       |
|            |             |             |             | MOX           | >0.9999       |
|            |             | Sedimentary | Silex       | Atmospheric   | 0.6803        |
|            |             |             |             | MOX           | 0.6254        |
|            | Silex       | Dissolution | Silex       | MOX           | <0.0001       |
|            |             |             |             | Sedimentary   | <0.0001       |
|            |             | Sedimentary | Silex       | Atmospheric   | <b>0.0003</b> |
|            |             |             |             | MOX           | <0.0001       |
| Silex      | Dissolution | Silex       | Atmospheric | <0.0001       |               |
|            |             |             | MOX         | <0.0001       |               |
|            | Sedimentary | Silex       | Atmospheric | <0.0001       |               |
|            |             |             | MOX         | >0.9999       |               |



Figure S1: Atmospheric pressure (atm) and pressure drop factor ( $\text{atm d}^{-1}$ ) from 27 March 2022 to 15 April 2022 and from 18 July 2022 to 23 July 2022 corresponding to the period of bubble flux measurements in the Silex pond in the city of Brussels (Belgium) (Fig. 5).

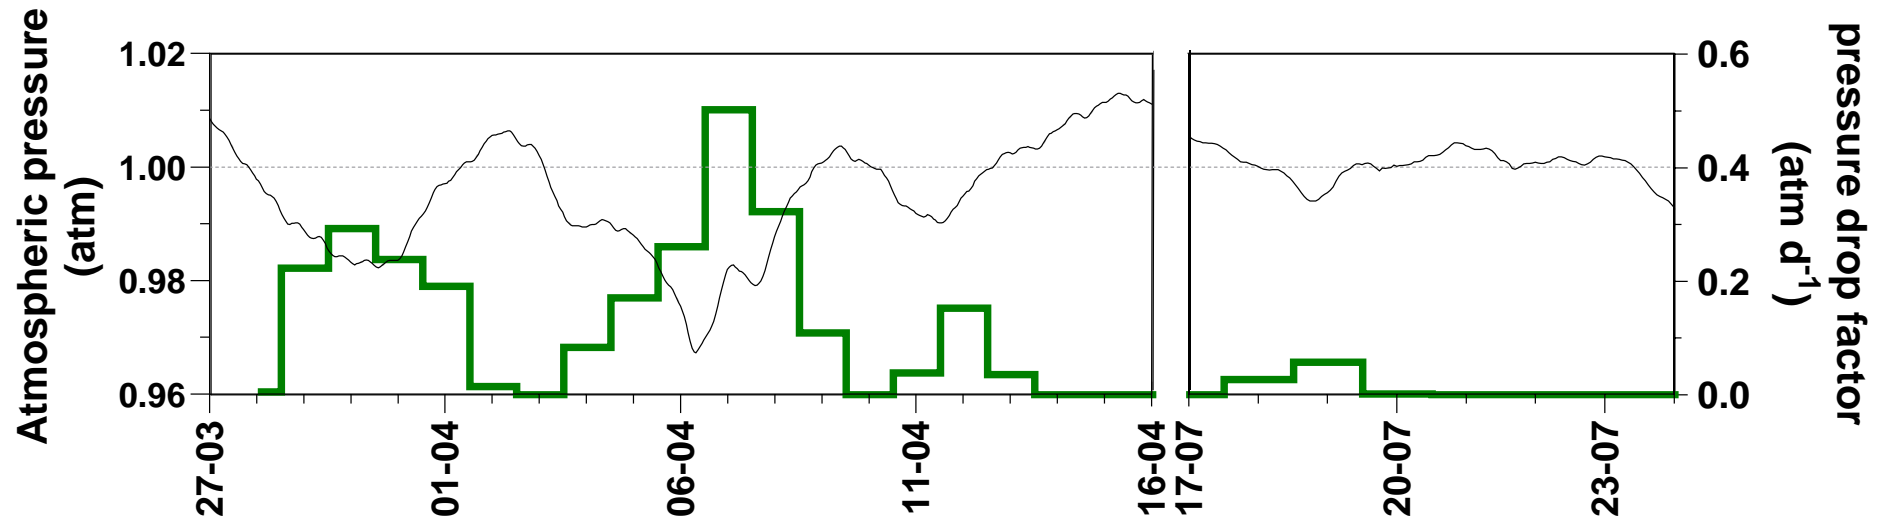

Figure S2: Daily mean air temperature (light grey line) and water temperature during sampling four urban ponds (Leybeek, Pêcherries, Tenreuken, and Silex) of the city of Brussels (Belgium), daily precipitation (dark grey line), monthly temperature anomaly ( $^{\circ}\text{C}$ ) relative to the period 1991-2020, and daily wind speed ( $\text{m s}^{-1}$ ) from January 2021 to December 2023.

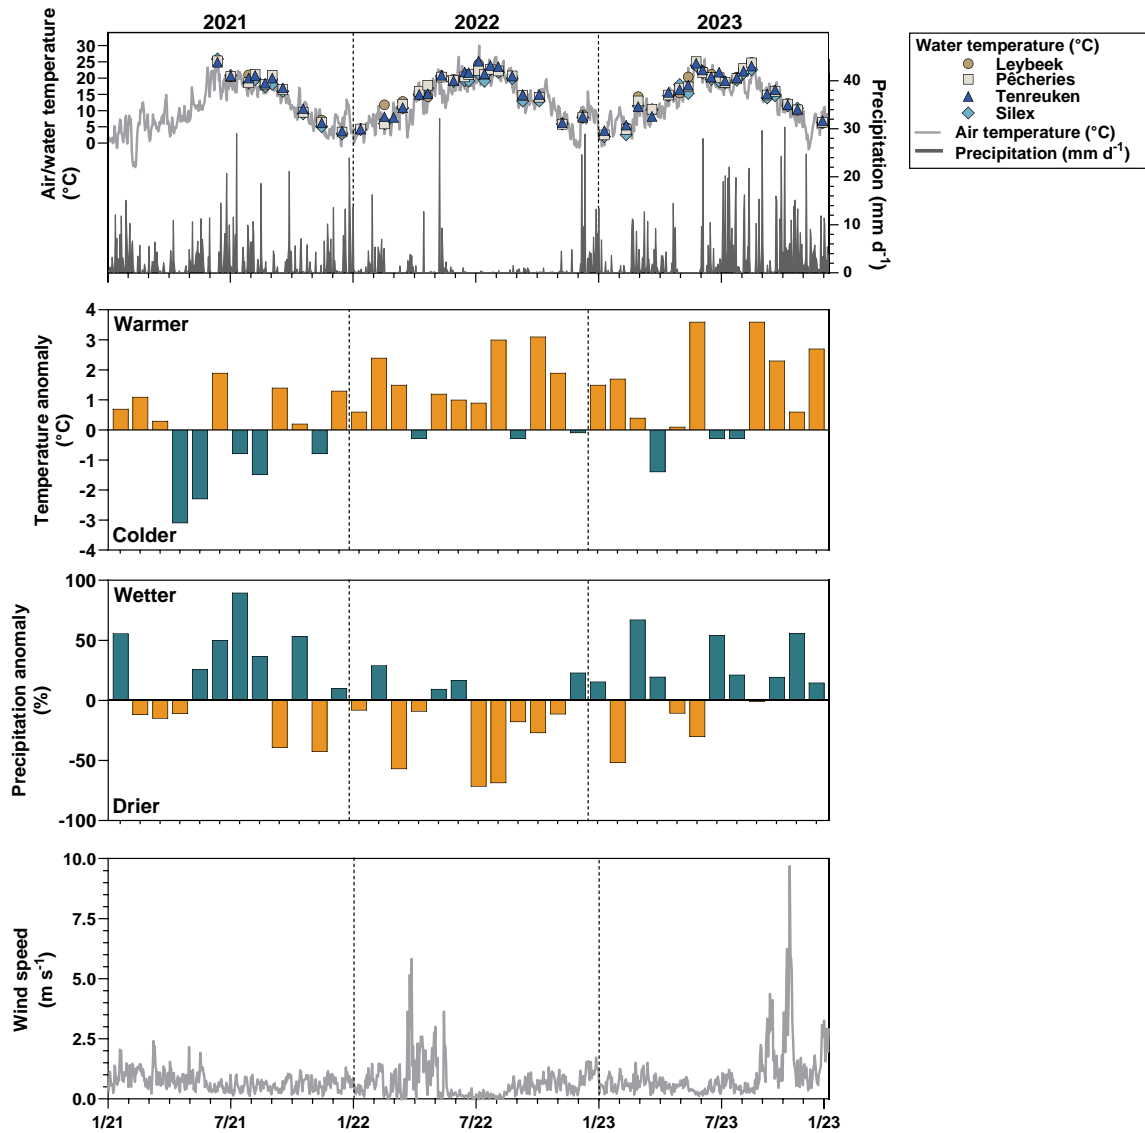

Figure S3: Comparison between measured bubble flux and predicted bubbles flux at low temperature (Temp < 15°C), high temperature (>15°C), and all temperatures from multiple linear models with temperature alone or both temperature and atmospheric pressure drop as predicted variables in four urban ponds (Leybeek, Pêcheres, Tenreuken, and Silex) of the city of Brussels (Belgium). Bubble fluxes were measured at different seasons in 2022 and 2023, totaling 8 days in Leybeek, Pêcheres and Tenreuken ponds and 24 days in Silex pond, with three bubble traps.

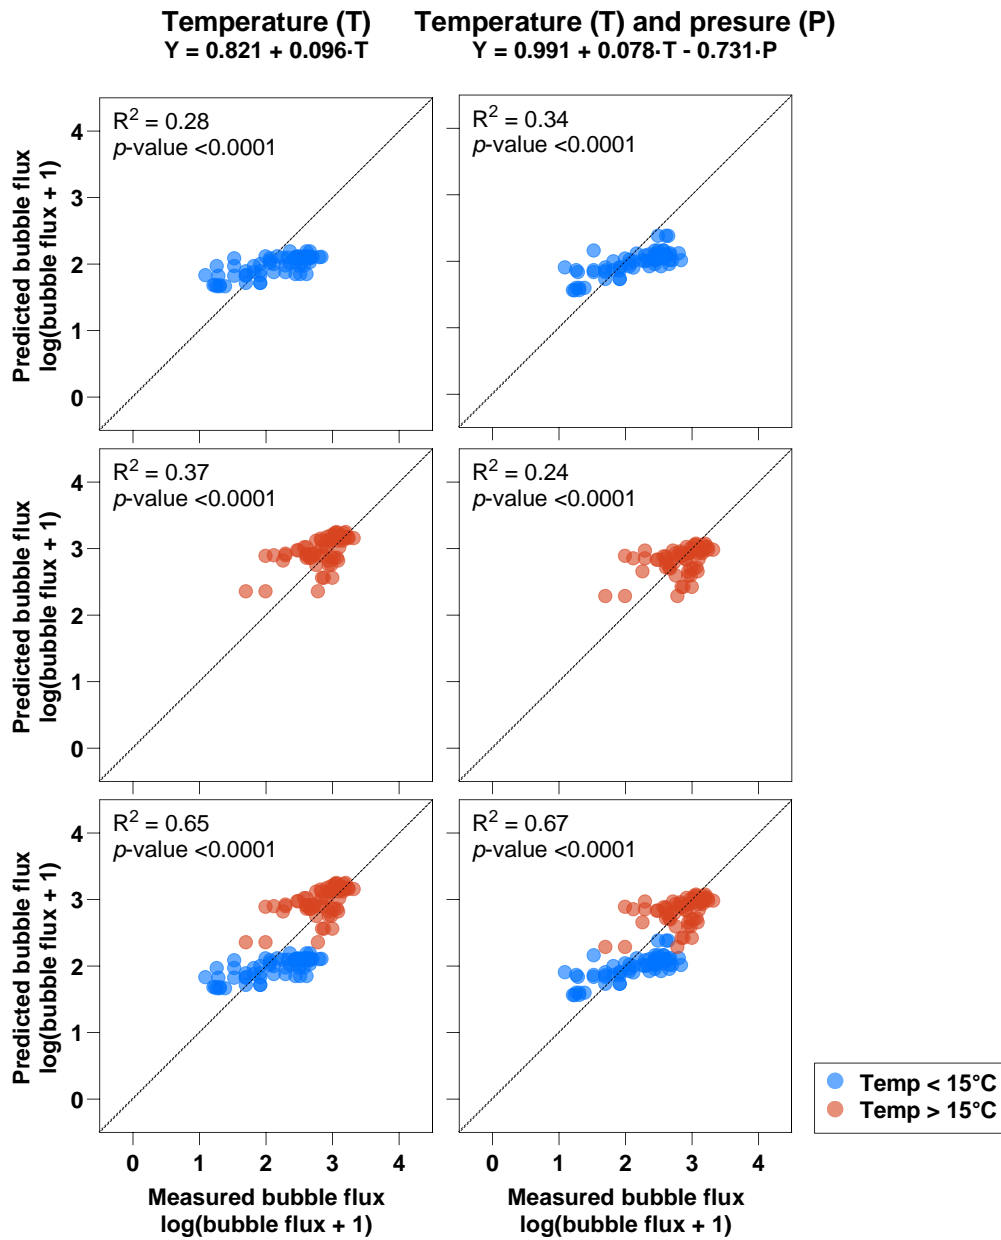

Figure S4: Relative contribution of ebullitive and diffusive CH<sub>4</sub> fluxes to total (ebullitive + diffusive) CH<sub>4</sub> flux as function of temperature in four urban ponds (Leybeek, Pêcherries, Tenreuken, and Silex) of the city of Brussels (Belgium). Ebullitive CH<sub>4</sub> fluxes were measured at different seasons in 2022 and 2023, totaling 8 days in Leybeek, Pêcherries and Tenreuken ponds and 24 days in Silex pond, with three bubble traps and data were collected 46 times on each pond from June 2021 to December 2023 for diffusive CH<sub>4</sub> fluxes. Regressions lines of fitted data of the relative contribution of ebullition to total (Ebul/Tot) are shown in light green and the relative contribution of diffusion to total (Diff/Tot) in dark green (Table S3).

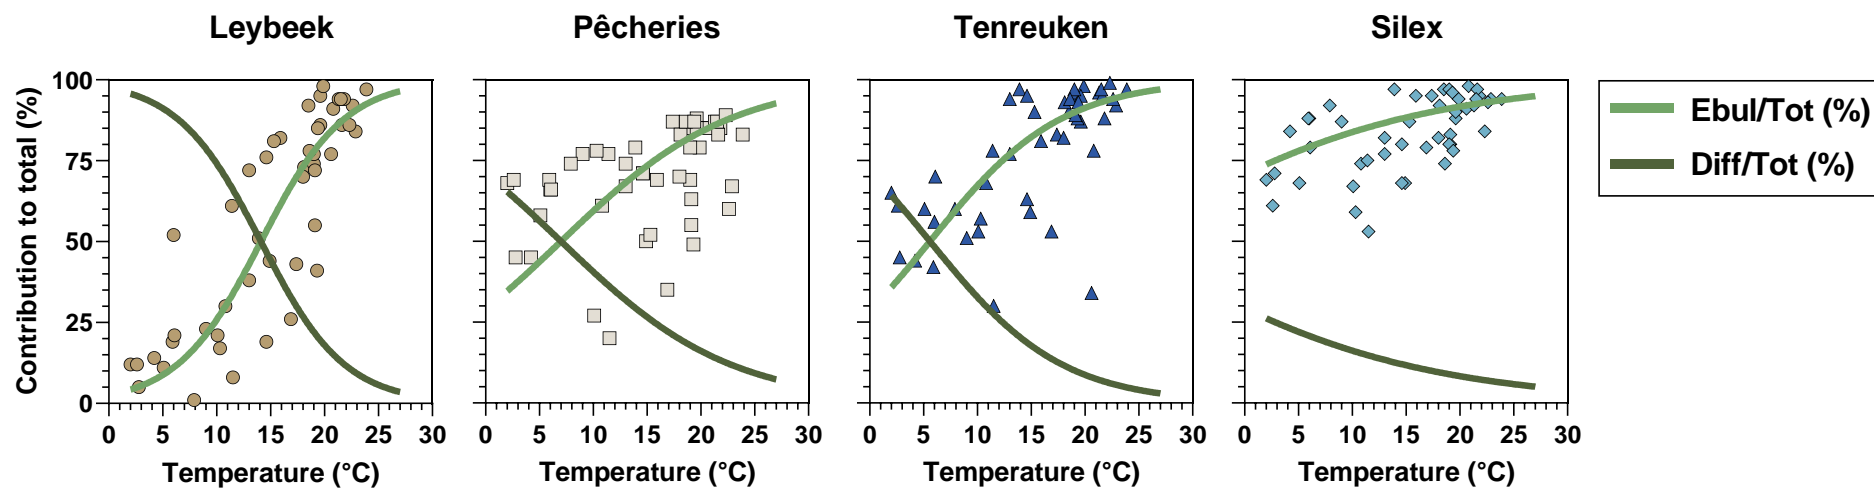

Figure S5: Ebullitive CH<sub>4</sub> fluxes (mmol m<sup>-2</sup> d<sup>-1</sup>) versus diffusive CH<sub>4</sub> fluxes (mmol m<sup>-2</sup> d<sup>-1</sup>) and chlorophyll-*a* (Chl-*a*, in μg L<sup>-1</sup>) in ponds of similar surface area (0.4 to 4.0 ha) compiled by Deemer and Holgerson (2021), and in four ponds (Leybeek, Pêcheries, Tenreuken, and Silex) in the city of Brussels (Belgium) from June 2021 to December 2023. Regression lines of fitted data of ebullitive CH<sub>4</sub> flux from Deemer and Holgerson (2021) are shown in green and (Table S5).

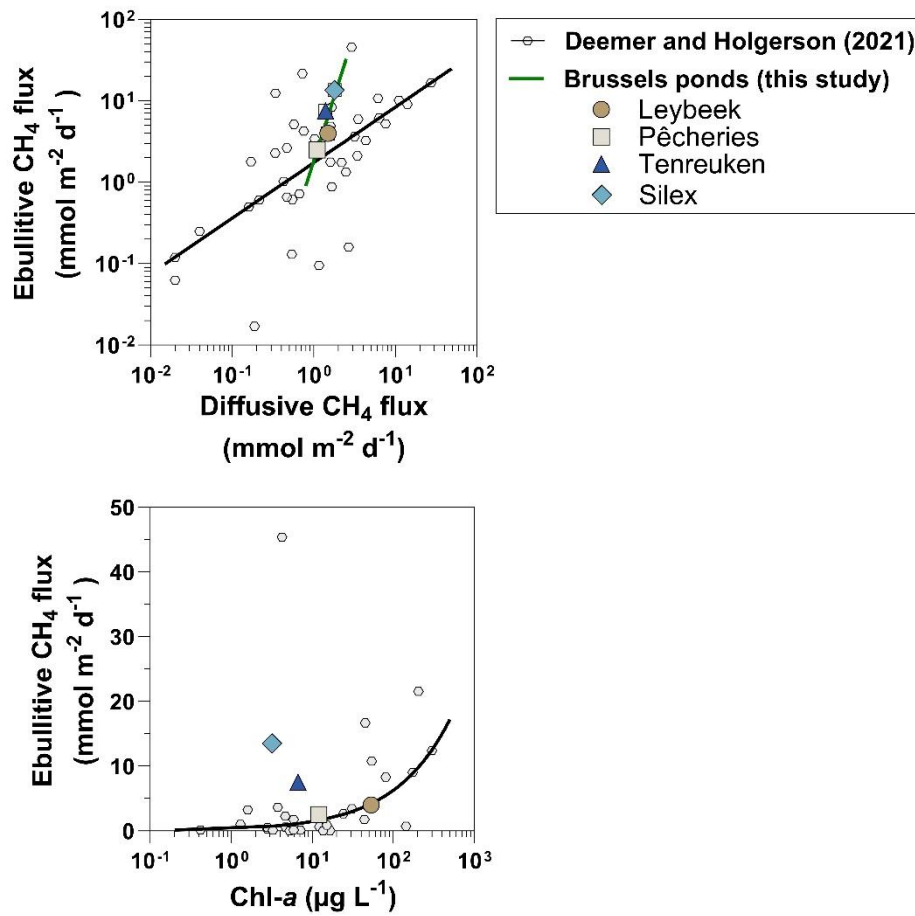

Supplement: Supplementary file 1 [file egusphere-2024-1315-supplement.pdf]
